# Supplementary material for: Phase engineering of dual active 2D Bi2O3-based nanocatalysts for alkaline hydrogen evolution reaction electrocatalysis
Source: Royal Society of Chemistry journal article supplement (doi:10.1039/d1ta09019d), 2021-11-29
Supplement: d1ta09019d1.pdf [file d1ta09019d1.pdf]

## Supporting Information

### **Phase Engineering of dual active 2D Bi<sub>2</sub>O<sub>3</sub>-based Nanosheets for Enhanced Alkaline Hydrogen Evolution Reaction Electrocatalysis**

*Ziyang Wu, Jun Mei, Qiong Liu, Sen Wang, Wei Li, Shihui Xing, Juan Bai, Jianping Yang, Wei Luo, Olga Guseynikova, Anthony P. O'Mullane, Yuantong Gu, Yusuke Yamauchi, Ting Liao\*, and Ziqi Sun\**

#### **\*Corresponding Author**

E-mail: t3.liao@qut.edu.au (Ting Liao); ziqi.sun@qut.edu.au (Ziqi Sun)

**Theoretical calculations:** All calculations were performed within the spin-polarized density functional theory (DFT) framework as implemented in the Quantum-Espresso package. Ultrasoft pseudopotentials are introduced to describe the electron-ion interactions. Perdew-Burke-Ernzerhof (PBE) function in the generalized gradient approximation (GGA) was employed to describe the exchange-correlation functional. The Kohn-Sham (KS) orbitals and the charge density were represented using basis sets consisting of plane waves (PWs) up to a maximal kinetic energy of 50 Ry and 400 Ry, respectively. The Gibbs free energy of the adsorbed hydrogen atom is calculated by  $\Delta G_H = \Delta E_H + \Delta E_{ZPE} - T\Delta S_H$ . Where  $\Delta E_H$  is the adsorption energy of the hydrogen atom described above, and  $\Delta E_{ZPE}$  is the zero-point energy correction for hydrogen adsorption. As for  $\Delta S_H$ , it can be obtained by  $\Delta S_H \cong -1/2S_{H_2}^0$ , where  $S_{H_2}^0$  is the entropy of a hydrogen molecule in the gas phase at the standard condition. Therefore, the overall corrections are expressed by  $\Delta G_H = \Delta E_H + 0.24$ , where 0.24 eV is the contribution from combination of ZPE and entropy at 298 K for surface models.

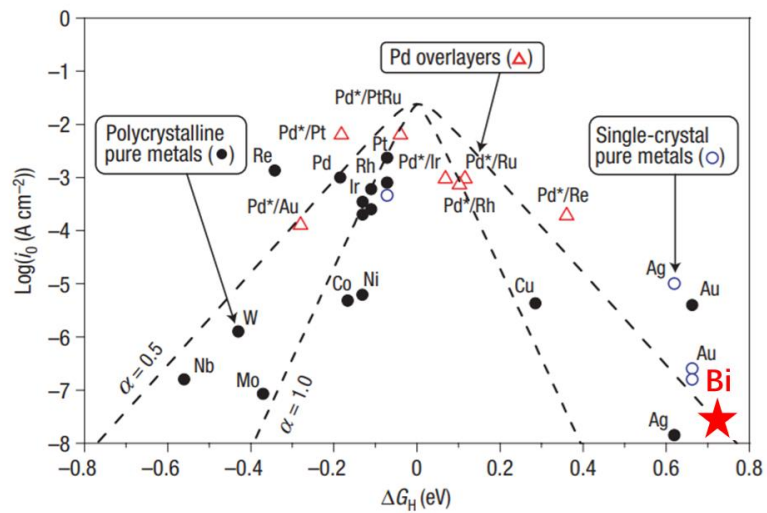

**Figure S1.** The calculated  $\Delta G_{H^*}$  values of different pure metals and metal overlayers [1].

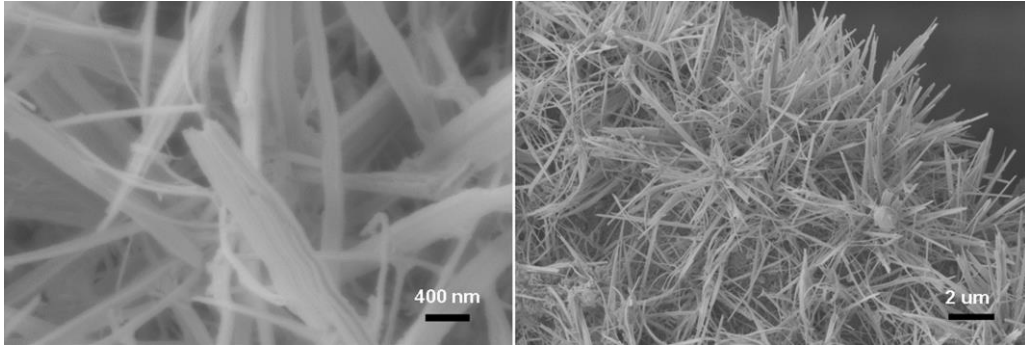

**Figure S2.** The SEM images of the sample RT without EG under different magnification. The scale bars are 400 nm and 2  $\mu\text{m}$ , respectively.

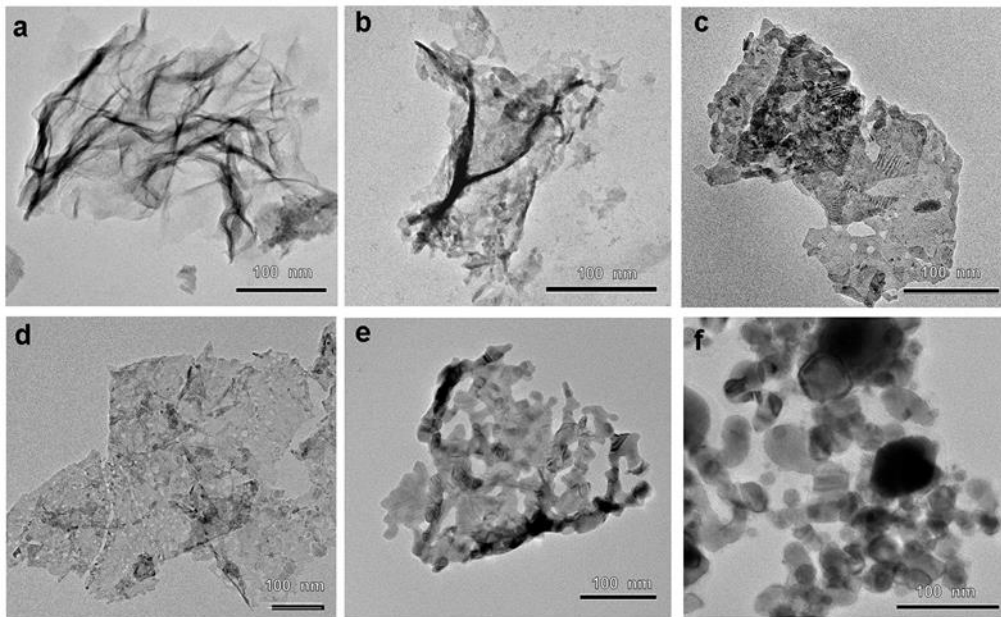

**Figure S3.** The low magnification of TEM images for sample RT, sample 400-Air, sample 200-H<sub>2</sub>, sample 300-H<sub>2</sub>, sample 400-H<sub>2</sub> and sample 500-H<sub>2</sub>, respectively. The scale bars are 100 nm.

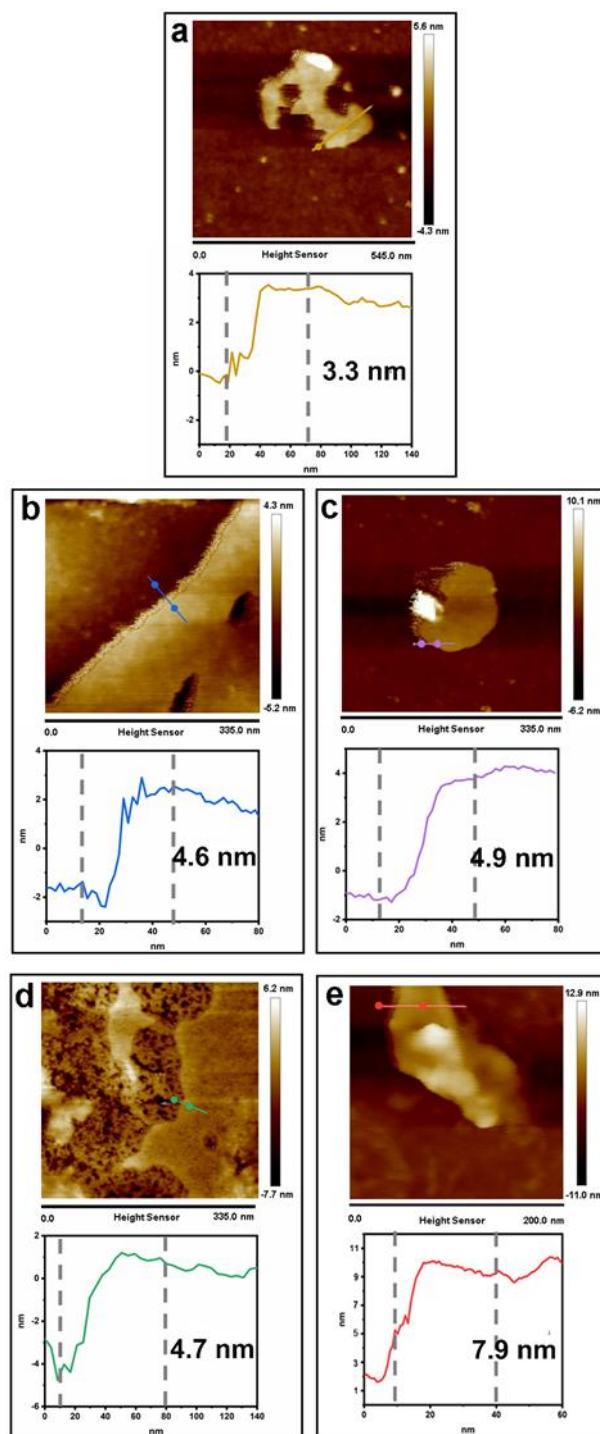

**Figure S4.** The AFM images of the (a) sample RT, (b) sample 400-Air, (c) sample 200-H<sub>2</sub>, (d) sample 300-H<sub>2</sub>, and (e) sample 400-H<sub>2</sub>, respectively.

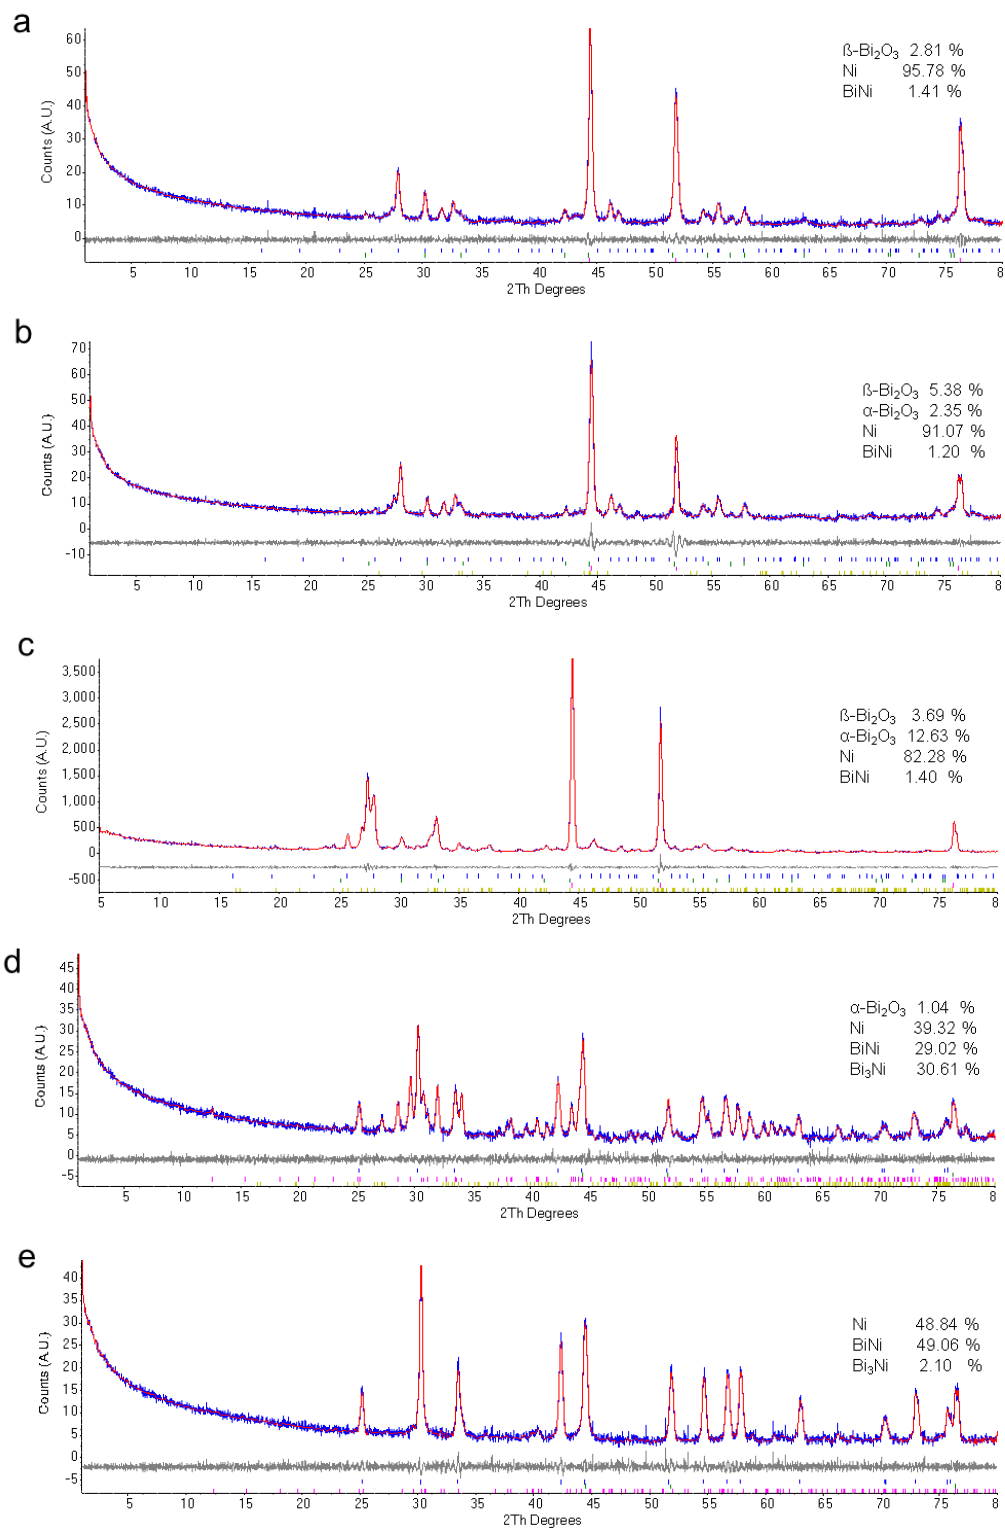

**Figure S5.** Rietveld refinement of the patterns of (a) 400-Air, (b) 200-H<sub>2</sub>, (c) 300-H<sub>2</sub>, (d) 400-H<sub>2</sub> and (e) 500-H<sub>2</sub>.

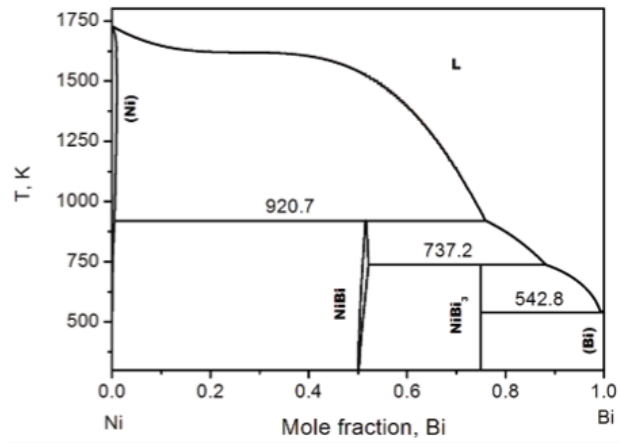

**Figure S6.** The Bi-Ni alloy phase diagram [2].



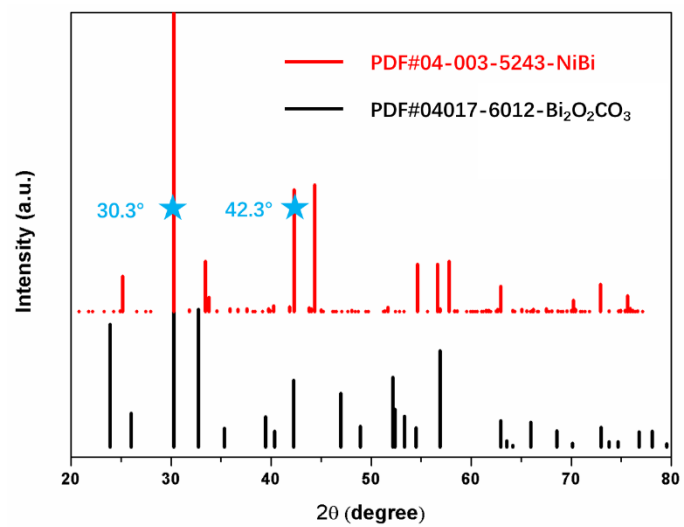

**Figure S7.** The XRD PDF patterns of NiBi and Bi<sub>2</sub>O<sub>2</sub>CO<sub>3</sub>.

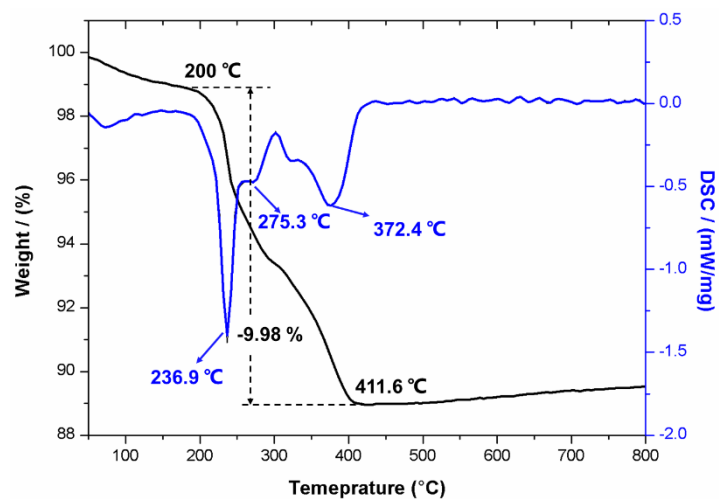

**Figure S8.** The thermogravimetric analysis (TGA) of  $\text{Bi}_2\text{O}_2\text{CO}_3$  powder under air with a heating rate of  $5\text{ }^\circ\text{C}/\text{min}$ .

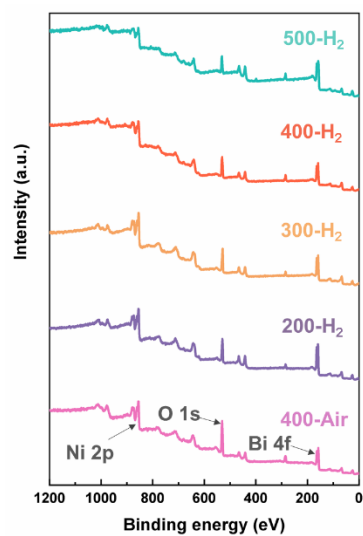

**Figure S9.** The wide scan spectrum of the prepared samples.

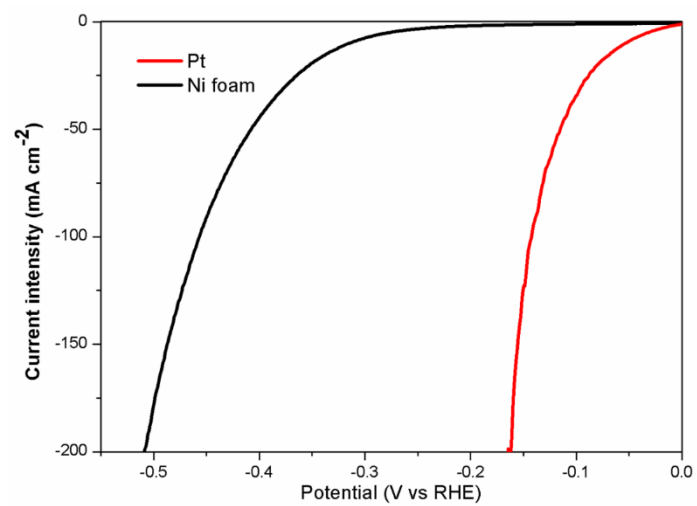

**Figure S10.** The polarization curves of bare Ni foam and Pt/C loaded Ni foam with a scan rate of  $5 \text{ mV s}^{-1}$

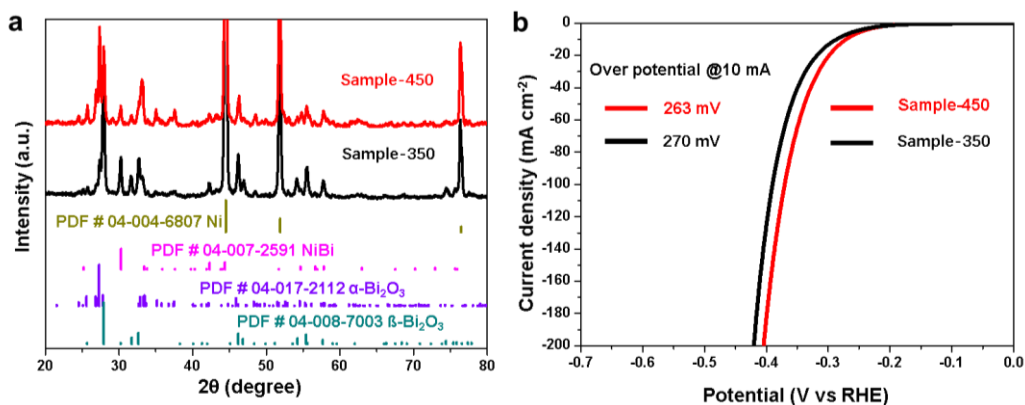

**Figure S11.** (a) The XRD data of sample-450 and sample 350 and (b) the polarization curves of different catalysts with a scan rate of  $5 \text{ mV s}^{-1}$  in  $1.0 \text{ M KOH}$ . Sample 350 and sample 450 were fabricated by the sample RT at  $350 \text{ }^\circ\text{C}$  and  $450 \text{ }^\circ\text{C}$ , respectively. As shown in the Figure11a, compared with sample-350, sample-450 demonstrated significantly increased  $\alpha\text{-Bi}_2\text{O}_3$  content, which can be characterized by the distinct peak position at and  $27.9^\circ$  and  $27.3^\circ$  for  $\beta\text{-Bi}_2\text{O}_3$  and  $\alpha\text{-Bi}_2\text{O}_3$ , respectively. However, no significant HER difference was observed, also demonstrating the electrolytic improvement mainly stem from the phase engineering of alloy instead of phases change of  $\text{Bi}_2\text{O}_3$ .

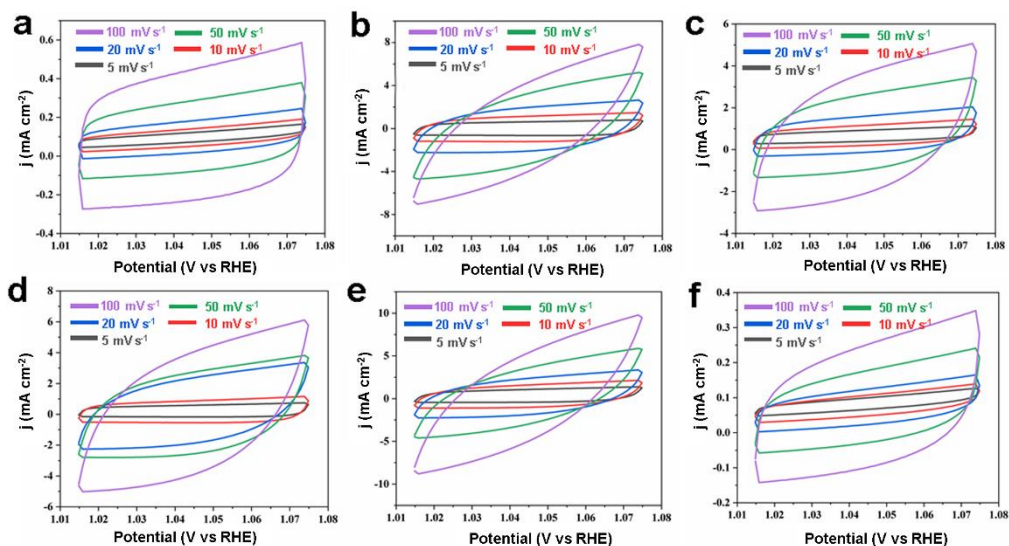

**Figure S12.** The cyclic voltammetry (CV) cycles in the region between 1.01 V and 1.08 V (vs. RHE) at different scan rates (5, 10, 20, 50 and 100  $\text{mV s}^{-1}$ ) of sample (a) RT, (b) 400-Air, (c) 200-H<sub>2</sub>, (d) 300-H<sub>2</sub>, (e) 400-H<sub>2</sub> and (f) 500-H<sub>2</sub>.

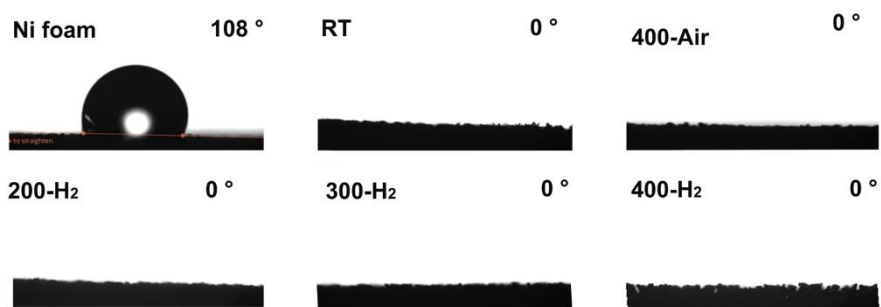

**Figure S13.** The water contact angle (5 μL) of different samples.

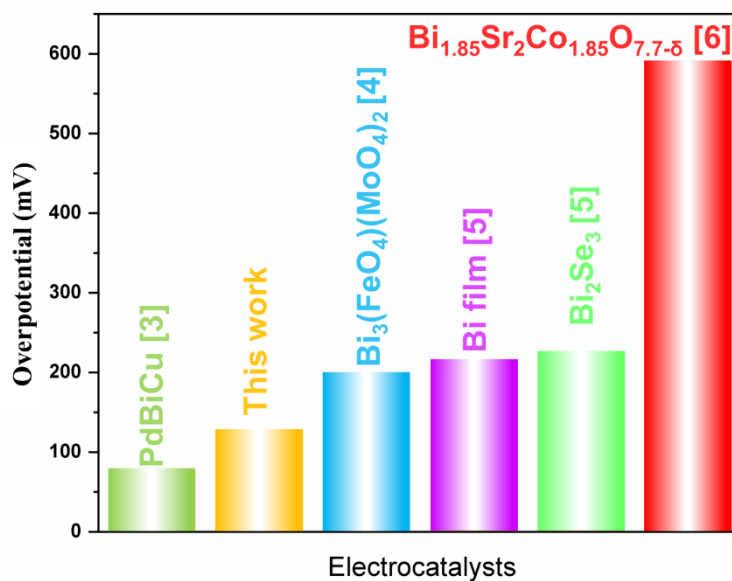

**Figure S14.** Comparison of the overpotentials required to reach the current density of  $10 \text{ mA cm}^{-2}$  among the reported Bismuth-based electrocatalysts [3-6]. Notes: as very few Bismuth based electrocatalysts was employed for alkaline HER, the referredces cited here (3 and 6) were tested under acid condition.



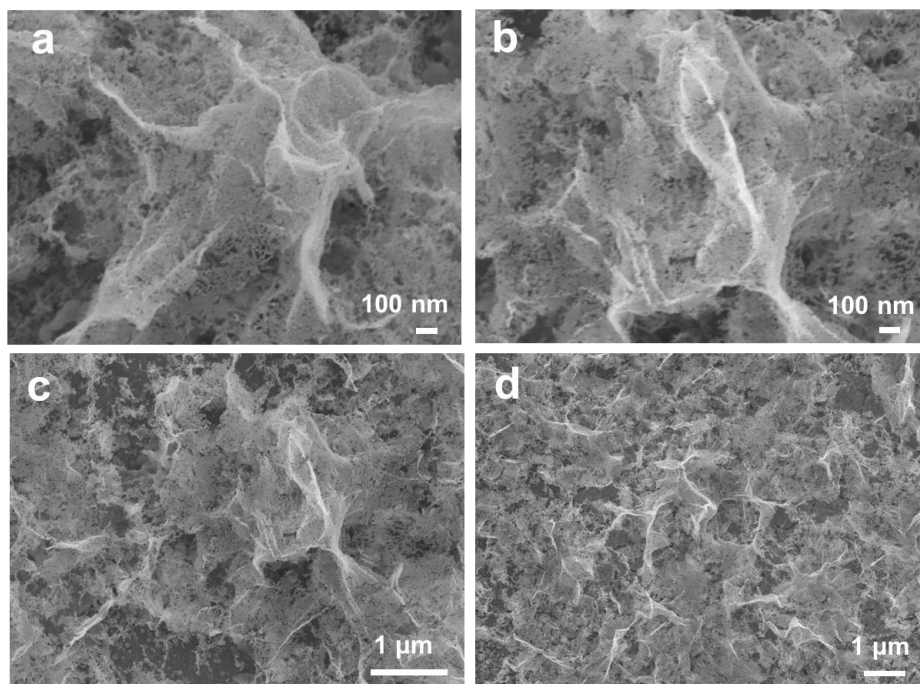

**Figure S15.** The SEM images of the 400-H<sub>2</sub> sample after the HER operation.

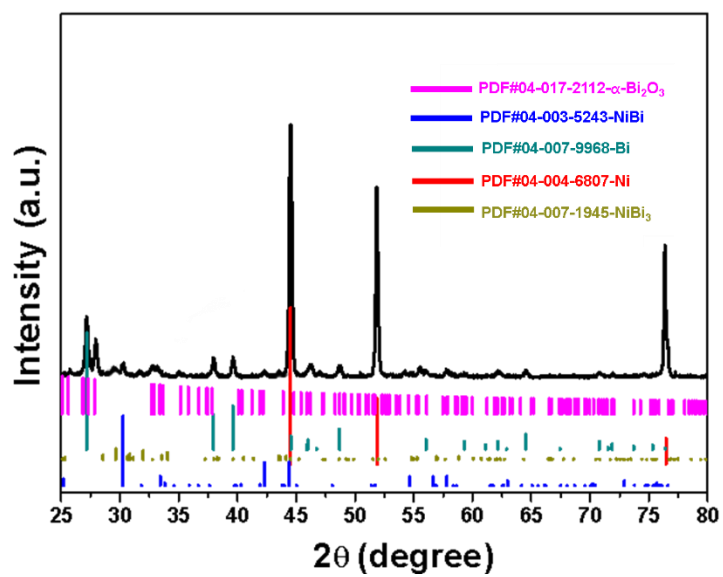

**Figure S16.** The XRD patterns of the 400-H<sub>2</sub> sample after the HER operation. It should be noted Bi metal formed after the long time HER operation as well as the existence of NiBi NiBi<sub>3</sub> and  $\alpha$ -Bi<sub>2</sub>O<sub>3</sub>.

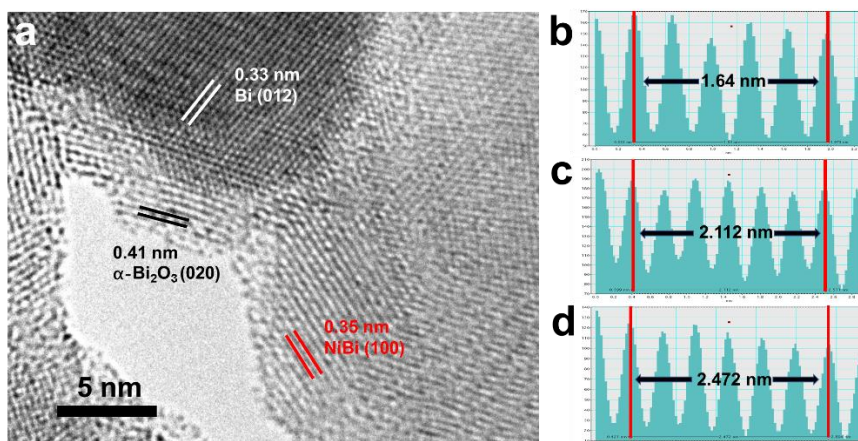

**Figure S17.** (a) The high-resolution TEM images of the 400-H<sub>2</sub> sample after the HER operation and the intensity line profile of the HRTEM images of (b) Bi (012), (c) NiBi (100) and (d)  $\alpha$ -Bi<sub>2</sub>O<sub>3</sub> (020)

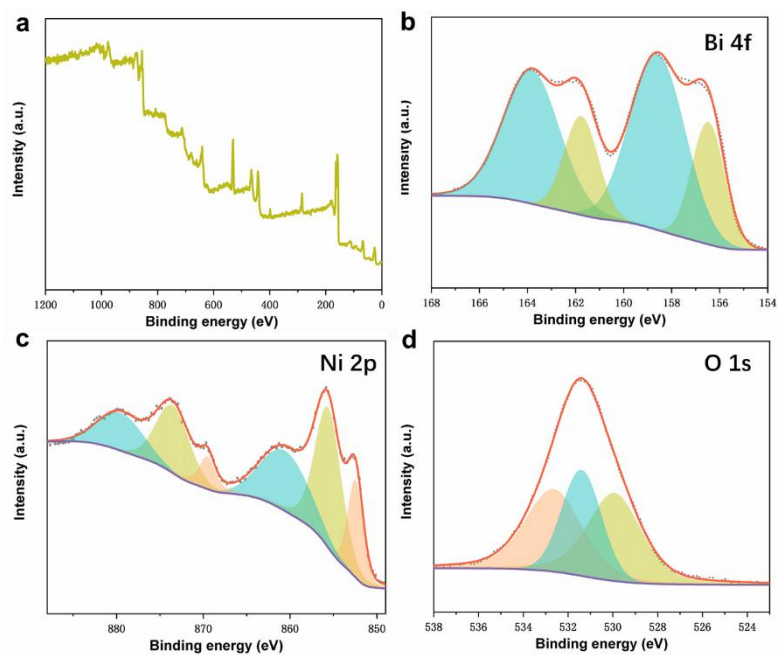

**Figure S18.** The XPS images of the 400-H<sub>2</sub> sample after the HER operation.

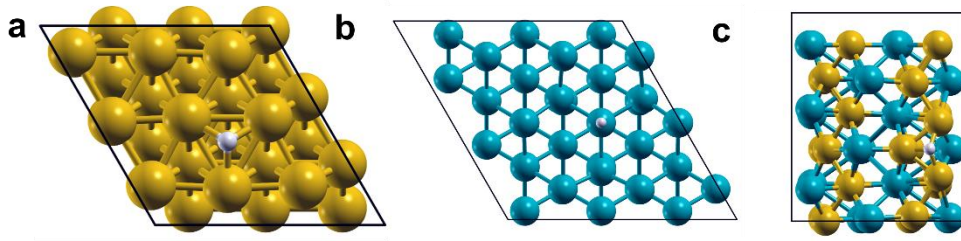

**Figure S19.** The schematic views of (a) Ni, (b) Bi, and (c) BiNi.

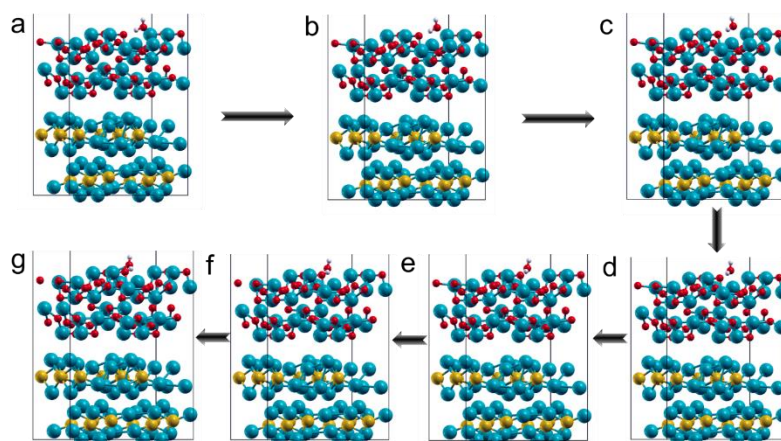

**Figure S20.** The detailed process of the water adsorption steps on to the  $\text{Bi}_2\text{O}_3/\text{Bi}_3\text{Ni}$  catalysts surface with DFT.

**Table S1.** The calculated contents of different phases from the XRD data of sample 400-Air, sample 200-H<sub>2</sub>, sample 300-H<sub>2</sub>, sample 400-H<sub>2</sub> and sample 500-H<sub>2</sub>, respectively.

|                    | <b>Nickel (%)</b> | <b><math>\alpha</math>-Bi<sub>2</sub>O<sub>3</sub> (%)</b> | <b><math>\beta</math>-Bi<sub>2</sub>O<sub>3</sub> (%)</b> | <b>BiNi (%)</b> | <b>Bi<sub>3</sub>Ni(%)</b> |
|--------------------|-------------------|------------------------------------------------------------|-----------------------------------------------------------|-----------------|----------------------------|
| 400-Air            | 95.78             |                                                            | 2.81                                                      | 1.41            |                            |
| 200-H <sub>2</sub> | 91.07             | 2.35                                                       | 5.38                                                      | 1.20            |                            |
| 300-H <sub>2</sub> | 82.28             | 12.63                                                      | 3.69                                                      | 1.40            |                            |
| 400-H <sub>2</sub> | 39.32             | 1.04                                                       |                                                           | 29.02           | 30.61                      |
| 500-H <sub>2</sub> | 48.84             |                                                            |                                                           | 49.06           | 2.10                       |

**Table S2.** The ratio of the content of Ni and Bi calculated from XPS for different samples.

|                    | <b>Nickel (%)</b> | <b>Bi (%)</b> | <b>Bi<sup>3+</sup> (%)</b> | <b>Bi<sup>0</sup> (%)</b> | <b>O (%)</b> | <b>C (%)</b> |
|--------------------|-------------------|---------------|----------------------------|---------------------------|--------------|--------------|
| 400-Air            | 21.29             | 7.89          | 100                        |                           | 46.48        | 24.34        |
| 200-H <sub>2</sub> | 21.96             | 6.25          | 100                        |                           | 46.14        | 25.65        |
| 300-H <sub>2</sub> | 14.69             | 5.42          | 100                        |                           | 42.05        | 37.84        |
| 400-H <sub>2</sub> | 11.38             | 10.06         | 70.17                      | 29.83                     | 37.88        | 40.68        |
| 500-H <sub>2</sub> | 8.67              | 13.01         | 48.91                      | 51.09                     | 35.47        | 42.85        |



**Table S3.** The of calculated resistance values of ohmic resistance ( $R_s$ ) and charge transfer resistance ( $R_{ct}$ ).

|                       | <b>RT</b> | <b>400-Air</b> | <b>200-H<sub>2</sub></b> | <b>300-H<sub>2</sub></b> | <b>400-H<sub>2</sub></b> | <b>500-H<sub>2</sub></b> |
|-----------------------|-----------|----------------|--------------------------|--------------------------|--------------------------|--------------------------|
| <b>R<sub>s</sub></b>  | 2.1       | 2.18           | 2                        | 2.17                     | 2.12                     | 2.24                     |
| <b>R<sub>ct</sub></b> | 6.21      | 3.47           | 4.05                     | 3.96                     | 2.59                     | 6.69                     |

## References

1. J. Greeley, T.F. Jaramillo, J. Bonde, I. Chorkendorff, J.K. Nørskov, *Nat. Mater.* **2006**, *5*, 909-913.
2. G. Vassilev, V. Gandova, P. Docheva, *Cryst. Res. Technol.* **2009**, *44*, 25-30.
3. L. Zheng, S. Zheng, H. Wei, L. Du, Z. Zhu, J. Chen, D. Yang, *ACS Appl. Mater. Interfaces*, **2019**, *11*, 6248-6256.
4. S. Khatun, P. Roy, *Chem. Commun.* **2020**, *56*, 7293-7296.
5. S. Razzaque, M.D. Khan, M. Aamir, M. Sohail, S. Bhoyate, R.K. Gupta, M. Sher, J. Akhtar, N. Revaprasadu, *Inorg. Chem.* **2021**, *60*, 1449-1461.
6. C.K. Chua, Z. Sofer, O. Jankovský, M.J.C. Pumera, *ChemPhysChem* **2015**, *16*, 769-774.
